# Supplementary material
Source: MDPI journal article supplement (https://www.mdpi.com/2071-1050/15/14/11354)

Figure S1: Rates of compliance with recommendations by type of behavior and educational level (male respondents)

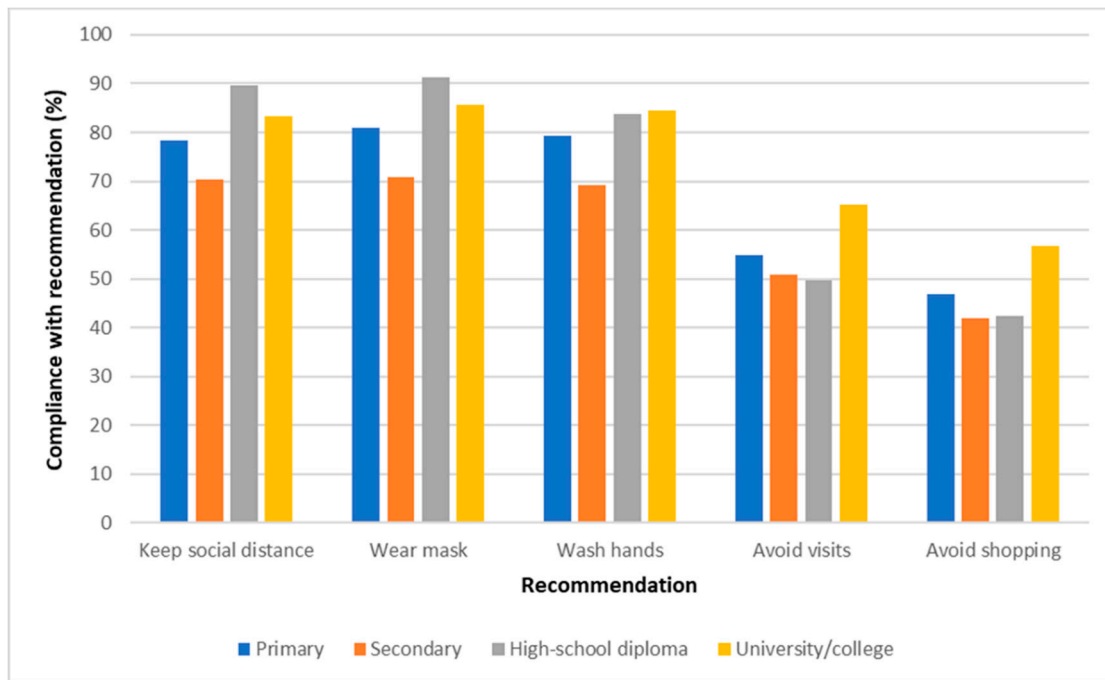

Figure S2: Rates of compliance with recommendations by type of behavior and educational level (female respondents)

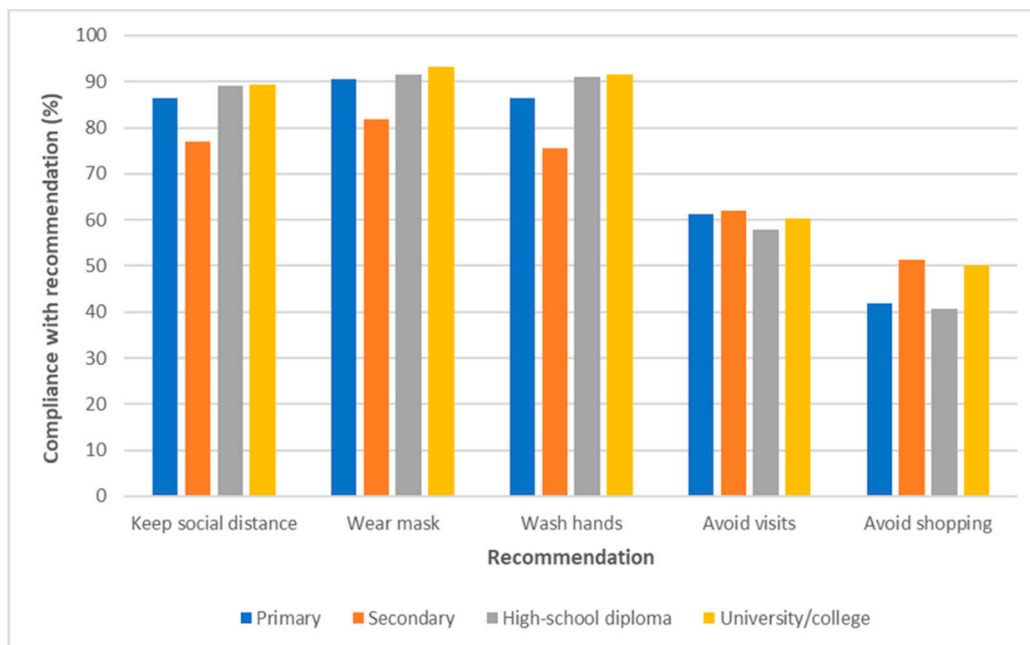

Supplement: s1 [file s1]
